# Supplementary material
Source: publisher site journal article supplement (https://www.spandidos-publications.com/5270/downloadSupplementary)
Supplement: Supplementary file 1 [file downloadSupplementary]

## Sheet: Sheet1
Table SVI. potential target genes of miR-202-3p
mirnaid	refseqid	genesymbol	duplex	start	end	bindingp	energy	seed	accessibility	au	phylopstem	phylopflank	me	number_of_pairings	binding_region_length	longest_consecutive_pairings	position	validated	TargetScan	miRDB
hsa-miR-202-3p	NM_001371525	HK2	AGAGGTATAGGGCATGGGAA#TTCCATGTCCCTGTATAATTCTA#(((((((((((((((((((.#))))))).))))))))..)))).	3150	3173	0.801282	-22.5	1	0.0216801	0.559	0	0	-13.9376	19	23	8	3UTR		1	1
hsa-miR-202-3p	NM_001286266	MRS2	AGAGGTATAGGGCATGGGAA#CCCCTGCCCTGCCCCA#...((..(((((((.(((..#))).)))))))..)).	2037	2053	0.801282	-20.2	0	0.450875	0.632	0	0	-10.6946	12	16	7	3UTR		0	1
hsa-miR-202-3p	NM_020662	MRS2	AGAGGTATAGGGCATGGGAA#CCCCTGCCCTGCCCCA#...((..(((((((.(((..#))).)))))))..)).	2187	2203	0.801282	-20.2	0	0.450875	0.632	-1.15713	-0.0253838	-10.6946	12	16	7	3UTR		0	1
hsa-miR-202-3p	NM_001256809	GRM4	AGAGGTATAGGGCATGGGAA#TCCCCTGCCCTGCAGCCCTG#((.(((.(((((((.((((.#)))).)))))))..))))).	3860	3880	0.807692	-23.1	0	0.000195314	0.412	0	0	-7.77425	16	20	7	3UTR		0	0
hsa-miR-202-3p	NM_001256813	GRM4	AGAGGTATAGGGCATGGGAA#TCCCCTGCCCTGCAGCCCTG#((.(((.(((((((.((((.#)))).)))))))..))))).	3770	3790	0.807692	-23.1	0	0.000195314	0.412	0	0	-7.77425	16	20	7	3UTR		0	0
hsa-miR-202-3p	NM_001256828	SMG6	AGAGGTATAGGGCATGGGAA#TTTCCTTGCCCCTTTAGCTGGTACCTCA#.(((((((.(((((.(((((#))))).))))).........))))))).	2765	2793	0.807692	-21.7	1	0.0021741	0.441	4.87276	4.0142	-5.58516	17	28	7	3UTR		0	0
hsa-miR-202-3p	NM_001256856	BTRC	AGAGGTATAGGGCATGGGAA#CCCAGTGCCCAGTGTCTCC#.(((((((.(((((((((..#)))).))))).))))))).	2215	2234	0.807692	-21	1	0.00222126	0.426	0.75507	0.290335	-4.84971	16	19	7	3UTR		0	0
hsa-miR-202-3p	NM_001261392	NOL10	AGAGGTATAGGGCATGGGAA#CCCATGTTTCAGTCACCTCC#.(((((((.(((((((((..#)))))))))..)).))))).	2989	3009	0.807692	-18.6	1	0.0551245	0.397	0	0	-4.84971	16	20	9	3UTR		0	0
hsa-miR-202-3p	NM_001261394	NOL10	AGAGGTATAGGGCATGGGAA#CCCATGTTTCAGTCACCTCC#.(((((((.(((((((((..#)))))))))..)).))))).	2917	2937	0.807692	-18.6	1	0.0551245	0.397	0	0	-4.84971	16	20	9	3UTR		0	0
hsa-miR-202-3p	NM_001261443	GNAL	AGAGGTATAGGGCATGGGAA#CCCTGCCCTCGCTTCTC#((((((..((((((.(((..#))))))))).)))))).	5604	5621	0.807692	-21.7	0	0.0263468	0.456	0	0	-8.53035	15	17	9	3UTR		0	0
hsa-miR-202-3p	NM_001261444	GNAL	AGAGGTATAGGGCATGGGAA#CCCTGCCCTCGCTTCTC#((((((..((((((.(((..#))))))))).)))))).	5007	5024	0.807692	-21.7	0	0.0263468	0.456	0	0	-8.53035	15	17	9	3UTR		0	0
hsa-miR-202-3p	NM_001267035	PWWP2A	AGAGGTATAGGGCATGGGAA#TTTCATGGACCTGTACCA#...((((((((.(((((((.#)))))))..)))))))).	1636	1654	0.807692	-19.8	0	0.00204824	0.515	0	0	-9.86134	15	18	8	3UTR		0	0
hsa-miR-202-3p	NM_001267865	C7orf57	AGAGGTATAGGGCATGGGAA#CCCTCTGCCCTGCTGGCCTG#..((((.(((((((.(((..#)))..)))))))...)))).	1110	1130	0.807692	-21.5	0	3.74888e-05	0.441	0	0	-7.23614	14	20	7	3UTR		0	0
hsa-miR-202-3p	NM_001267866	C7orf57	AGAGGTATAGGGCATGGGAA#CCCTCTGCCCTGCTGGCCTG#..((((.(((((((.(((..#)))..)))))))...)))).	1098	1118	0.807692	-21.5	0	3.74888e-05	0.441	0	0	-7.23614	14	20	7	3UTR		0	0
hsa-miR-202-3p	NM_001277176	WDR72	AGAGGTATAGGGCATGGGAA#TTCCAGTGTTCTGTATTTTTA#(((((((((((((((.((((#)))).))))))))))))))).	3461	3482	0.807692	-19.2	1	0.0628846	0.779	0	0	-4.17062	19	21	15	3UTR		0	0
hsa-miR-202-3p	NM_001278318	LILRA1	AGAGGTATAGGGCATGGGAA#CCCTGATGCCCTGACACCCTCTC#(((((..(((((((((((..#)))..))))))))....))))).	1566	1589	0.807692	-22.2	0	0.337749	0.456	0	0	-7.38222	16	23	8	3UTR		0	0
hsa-miR-202-3p	NM_001283034	CIBAR1	AGAGGTATAGGGCATGGGAA#TCCATGCTTTCATTACCA#...((((.((((((((((..#))))))))))...)))).	1207	1225	0.807692	-17.5	0	0.0862906	0.632	0	0	-8.82818	14	18	10	3UTR		0	0
hsa-miR-202-3p	NM_001286209	GAS8	AGAGGTATAGGGCATGGGAA#CCACTGCCCTGTCTTTA#.((((.(((((((((((...#))).)))))))))))).	3016	3033	0.807692	-19.6	0	0.000488865	0.515	3.75913	1.8676	-5.69428	15	17	12	3UTR		0	0
hsa-miR-202-3p	NM_001286258	PKNOX1	AGAGGTATAGGGCATGGGAA#CCCAAATTGAGCATGTTGCTGTTATTCCTGCCCTGCACCTGTG#(.((((.(((((((.((((.#.))))))))))).)))).).	4275	4318	0.807692	-22.4	0	0.000773217	0.426	0	0	-7.38039	16	20	11	3UTR		0	0
hsa-miR-202-3p	NM_001286516	DNAJA3	AGAGGTATAGGGCATGGGAA#CCCATTCCCCAGCCTCTG#((((((...(((.(((((..#))))).)))..)))))).	2005	2023	0.807692	-21.5	0	0.00138325	0.456	3.04948	3.23063	-10.1404	14	18	6	3UTR		0	0
hsa-miR-202-3p	NM_001286619	MAP3K7CL	AGAGGTATAGGGCATGGGAA#TTTCATGCCTTTAATATTTCA#.((((((((((((((((((.#)))))))))))..))))))).	1484	1505	0.807692	-19.2	1	0.170308	0.75	0	0	-3.79332	18	21	11	3UTR		0	0
hsa-miR-202-3p	NM_001286620	MAP3K7CL	AGAGGTATAGGGCATGGGAA#TTTCATGCCTTTAATATTTCA#.((((((((((((((((((.#)))))))))))..))))))).	1163	1184	0.807692	-19.2	1	0.170308	0.75	0	0	-3.79332	18	21	11	3UTR		0	0
hsa-miR-202-3p	NM_001286805	TBC1D14	AGAGGTATAGGGCATGGGAA#CCTGTGCGCTGTTGTCCTCG#.((((.((((.(((((((..#))))))).))))...)))).	3160	3180	0.807692	-21.9	0	0.00464378	0.456	0	0	-8.51906	15	20	7	3UTR		0	0
hsa-miR-202-3p	NM_001286805	TBC1D14	AGAGGTATAGGGCATGGGAA#TCCCATGCCAGTGTGGAACACCTTC#.((((((((.(((((((((.#)))))))))..))).....))))).	3430	3455	0.807692	-21.8	1	0.000186751	0.515	0	0	-5.03583	17	25	9	3UTR		0	0
hsa-miR-202-3p	NM_001287050	SAXO1	AGAGGTATAGGGCATGGGAA#CATGCCCTAAGGGTGCCCCA#.(.(((((((((((((....#))))))))....))))).).	1032	1052	0.807692	-19.4	0	0.000273457	0.412	0	0	-5.35086	14	20	8	3UTR		0	0
hsa-miR-202-3p	NM_001287220	RPS6KC1	AGAGGTATAGGGCATGGGAA#TCCCTGCCCTACCA#...(((..((((((.((((.#))))))))))))).	4944	4958	0.807692	-20.9	0	0.0615803	0.559	0.401966	2.16245	-11.1073	13	14	13	3UTR		0	0
hsa-miR-202-3p	NM_001288622	ICA1L	AGAGGTATAGGGCATGGGAA#CCCATGTCTTAGGCCTCTC#((((((.(((((((((((..#))))))))))).)))))).	6474	6493	0.807692	-27	0	0.0186445	0.338	0	0	-5.48126	17	19	11	3UTR		0	0
hsa-miR-202-3p	NM_001288703	GGT6	AGAGGTATAGGGCATGGGAA#CCCATGCCTGCTGCCCCTT#((.((((..(((((((((..#)))))))))..)))).)).	916	935	0.807692	-24.1	0	0.00268298	0.353	0.0893502	-0.166491	-8.86514	15	19	9	3UTR		0	0
hsa-miR-202-3p	NM_001289155	MPI	AGAGGTATAGGGCATGGGAA#CCCAGGCCATTCTGCCCTGACCACCTCC#.(((((.(((((((((((..#))))........)))))))...))))).	3805	3833	0.807692	-22.5	0	0.00452282	0.471	0	0	-5.33701	16	28	7	3UTR		0	0
hsa-miR-202-3p	NM_001289157	MPI	AGAGGTATAGGGCATGGGAA#CCCAGGCCATTCTGCCCTGACCACCTCC#.(((((.(((((((((((..#))))........)))))))...))))).	3831	3859	0.807692	-22.5	0	0.00452282	0.471	0.1971	0.0245722	-5.33701	16	28	7	3UTR		0	0
hsa-miR-202-3p	NM_001291942	C3orf14	AGAGGTATAGGGCATGGGAA#TCCCATTAATGGGCTTTATGTTCCTCA#.((((((((((((((((((.#))))))......))))))))..)))).	2540	2567	0.807692	-19.5	1	0.000182427	0.574	0.182127	1.16028	-3.79332	18	27	8	3UTR		0	0
hsa-miR-202-3p	NM_001292017	ENOPH1	AGAGGTATAGGGCATGGGAA#TCCACATGCCGCCATAGCA#...(.(((.((((((((((.#))).)))))).).))).).	1993	2012	0.807692	-17	0	0.0699825	0.647	0	0	-11.69	14	19	6	3UTR		0	0
hsa-miR-202-3p	NM_001293291	MYEOV	AGAGGTATAGGGCATGGGAA#TCCCATTCTTCCCTGCCTCTT#((((((..((((.((((((.#))))))....)))))))))).	1675	1696	0.807692	-20.8	0	0.834449	0.574	0.667311	1.5139	-9.08403	16	21	10	3UTR		0	0
hsa-miR-202-3p	NM_001300823	PRDM5	AGAGGTATAGGGCATGGGAA#TCCACATTTGTTAGGATGAACATAGCCCTTTCCCCTCTC#(((((...((((((((....#.))).)))))....))))).	2809	2848	0.807692	-17.8	0	0.125668	0.574	0	0	-9.69585	13	20	5	3UTR		0	0
hsa-miR-202-3p	NM_001300824	PRDM5	AGAGGTATAGGGCATGGGAA#CATAGCCCTTTCCCCTCTC#(((((...((((((((....#))).)))))....))))).	2743	2762	0.807692	-17.5	0	0.125668	0.574	0.000141389	-0.0570464	-9.69585	13	19	5	3UTR		0	0
hsa-miR-202-3p	NM_001300963	CDK19	AGAGGTATAGGGCATGGGAA#TCCTGTGCCCTAAAGCCTCA#.(((((.((((((((((((.#))))))))))))..))))).	3386	3406	0.807692	-28.7	0	0.0194796	0.515	0	0	-5.33701	17	20	12	3UTR		0	0
hsa-miR-202-3p	NM_001303	COX10	AGAGGTATAGGGCATGGGAA#CCAGCCGGATACCTCTG#((((((((..(((.(((...#))))))..)))))))).	2196	2213	0.807692	-21.5	1	4.47823e-07	0.426	0	0	-7.09331	14	17	8	3UTR		0	0
hsa-miR-202-3p	NM_001303039	C7orf26	AGAGGTATAGGGCATGGGAA#CCCGTGTGTCTGGCCTCTT#((((((...(.(((((((..#))))))).)...)))))).	1653	1672	0.807692	-21.1	0	0.000124781	0.353	0	0	-11.6761	14	19	7	3UTR		0	0
hsa-miR-202-3p	NM_001303508	ISX	AGAGGTATAGGGCATGGGAA#GTGCCCTGGGCCTCTG#((((((.((((((((.....#)))))))).)))))).	1441	1457	0.807692	-23.4	0	1.02708e-06	0.471	0	0	-5.71431	14	16	8	3UTR		0	0
hsa-miR-202-3p	NM_001304797	CCDC134	AGAGGTATAGGGCATGGGAA#TCCCTGCCAGGTGCCTGTA#(.((((((..((((.((((.#))))))))..)))))).).	3707	3726	0.807692	-22.2	1	3.93556e-06	0.441	0	0	-8.1356	15	19	8	3UTR		0	0
hsa-miR-202-3p	NM_001305225	GVQW3	AGAGGTATAGGGCATGGGAA#TGCCATGGCCCTCCTCA#.((((...(((((((((.(.#).))))).)))))))).	1242	1259	0.807692	-20.1	0	0.0153846	0.485	0	0	-9.55161	14	17	8	3UTR		0	0
hsa-miR-202-3p	NM_001308096	GLYR1	AGAGGTATAGGGCATGGGAA#CCATGCCCCAGATGCCA#...(((((.((((((((...#))))))))...))))).	2416	2433	0.807692	-22.2	0	0.00948274	0.279	0	0	-7.57093	13	17	8	3UTR		0	0
hsa-miR-202-3p	NM_001308135	ZBTB8OS	AGAGGTATAGGGCATGGGAA#CTCATGCCCTTCCAGTGCAATGCAAGCCCTCCAGCCTCA#.(((((..((((((((((..#)))))))))).......................))))).	1156	1195	0.807692	-22.5	0	0.0318088	0.412	0	0	-7.65065	15	39	10	3UTR	MIRT516076	0	0
hsa-miR-202-3p	NM_001318915	LSAMP	AGAGGTATAGGGCATGGGAA#TCCTAAGCAGCCCTGTTTTACCTCC#.((((((((((((.(((((.#)))))....)))))))...))))).	2858	2883	0.807692	-21.8	1	0.0710683	0.574	5.31234	2.9457	-4.65016	17	25	7	3UTR		0	0
hsa-miR-202-3p	NM_001320226	LUC7L	AGAGGTATAGGGCATGGGAA#TCTGATGCTGCCTCC#.(((((....(((((.(((.#))).)))))))))).	1453	1468	0.807692	-16.8	0	0.506266	0.619	0	0	-10.1826	13	15	10	3UTR		0	0
hsa-miR-202-3p	NM_025208	PDGFD	AGAGGTATAGGGCATGGGAA#TTCCTGTGAAAACATCAGTTTCCTGTACCA#...(((((((((((((((((#))))))))............))))))))).	3257	3287	0.807692	-19.3	0	0.0912986	0.647	5.07141	4.38809	-6.51454	17	30	9	3UTR		0	0
hsa-miR-202-3p	NM_030786	SYNC	AGAGGTATAGGGCATGGGAA#TTCCCAAAGATCTTACCTCA#.((((((.(((...((((((#))))))....))))))))).	2200	2220	0.807692	-17.8	1	0.0607519	0.618	0	0	-11.5997	15	20	9	3UTR		0	0
hsa-miR-202-3p	NM_031475	ESPN	AGAGGTATAGGGCATGGGAA#CCTAGCCCGGGCCTCA#.(((((...((((.((((..#))))))))..))))).	3224	3240	0.807692	-21.8	0	1.06113e-05	0.368	0	0	-9.56388	13	16	8	3UTR		0	0
hsa-miR-202-3p	NM_032103	PPP1R12B	AGAGGTATAGGGCATGGGAA#CCCATGCCTTTGGACCTG#..((((..((((((((((..#))))))))))...)))).	10773	10791	0.807692	-23.4	0	0.000579844	0.441	0	0	-8.81432	14	18	10	3UTR		0	0
hsa-miR-202-3p	NM_032104	PPP1R12B	AGAGGTATAGGGCATGGGAA#CCCATGCCTTTGGACCTG#..((((..((((((((((..#))))))))))...)))).	10954	10972	0.807692	-23.4	0	0.000579844	0.441	0	0	-8.81432	14	18	10	3UTR		0	0
hsa-miR-202-3p	NM_032186	ZNF644	AGAGGTATAGGGCATGGGAA#TTCCTATGGTATATCTCC#.((((((((...((((((((#)))))))).)))))))).	1838	1856	0.807692	-17.4	1	0.00145723	0.662	0	0	-11.2074	16	18	8	3UTR	MIRT505007	0	1
hsa-miR-202-3p	NM_032569	GLYR1	AGAGGTATAGGGCATGGGAA#CCATGCCCCAGATGCCA#...(((((.((((((((...#))))))))...))))).	2434	2451	0.807692	-22.2	0	0.00948274	0.279	0	0	-7.57093	13	17	8	3UTR		0	0
hsa-miR-202-3p	NM_032800	C1orf198	AGAGGTATAGGGCATGGGAA#TTCCCCAGCCCTGACCA#...(((.((((((..(((((#)))))..))))))))).	1958	1975	0.807692	-21.6	0	0.00278479	0.397	0	0	-9.65052	14	17	9	3UTR		0	0
hsa-miR-202-3p	NM_032846	RAB2B	AGAGGTATAGGGCATGGGAA#CCATGGCTCATGCCTGTA#(.((((((.((.(((((...#))))).)).)))))).).	1030	1048	0.807692	-19.2	1	3.6631e-05	0.456	0	0	-9.50444	14	18	6	3UTR		0	0
hsa-miR-202-3p	NM_033085	FATE1	AGAGGTATAGGGCATGGGAA#CCACTGCCCTTGCCCCTT#((.((((.(((((((((...#))).)))))))))).)).	708	726	0.807692	-19.4	0	0.0426254	0.368	4.29027	3.68045	-7.80875	15	18	10	3UTR		0	0
hsa-miR-202-3p	NM_033199	UCN2	AGAGGTATAGGGCATGGGAA#TTGCCATGCCTGTGTGCCCCA#.(.((((((((((((((.((#)).)))))))).)))))).).	691	712	0.807692	-22.3	0	0.000107611	0.456	0	0	-5.35086	17	21	8	3UTR		0	0
hsa-miR-202-3p	NM_057176	BSND	AGAGGTATAGGGCATGGGAA#CCGGTGTCCTGGATTCCTCC#.((((..((((((((.((..#)).))))))))....)))).	7878	7898	0.807692	-22.1	0	0.000610581	0.426	0	0	-7.47102	14	20	8	3UTR		0	0
hsa-miR-202-3p	NM_133467	CITED4	AGAGGTATAGGGCATGGGAA#CCCGAACCCGTGGAGCAATGCCCTGTCTGGCCTCC#.(((((((((((((((((..#.)))........)))))))))...))))).	1245	1280	0.807692	-23.2	1	4.05995e-05	0.485	2.66967	2.53538	-3.79332	17	30	9	3UTR		0	0
hsa-miR-202-3p	NM_134260	RORA	AGAGGTATAGGGCATGGGAA#TTCCCATGTCTGTAAGATGAAAAGGATACCTTTA#((((((((.(((((((((((#)))))))))))..............)))))))).	7131	7165	0.807692	-21.5	1	0.00785707	0.706	0	0	-4.99396	19	34	11	3UTR		0	0
hsa-miR-202-3p	NM_134262	RORA	AGAGGTATAGGGCATGGGAA#TTCCCATGTCTGTAAGATGAAAAGGATACCTTTA#((((((((.(((((((((((#)))))))))))..............)))))))).	6820	6854	0.807692	-21.5	1	0.00785707	0.706	0	0	-4.99396	19	34	11	3UTR		0	0
hsa-miR-202-3p	NM_134445	CD99L2	AGAGGTATAGGGCATGGGAA#CCCACCCCTTCATTTGGACCCGCAGCTGCTGTGCTGCTCTGTGCCATCG#.(((((((((((((((((..#.))))............))))))))))).)).	710	759	0.807692	-21.4	1	4.29654e-05	0.412	6.25025	5.43461	-3.79332	17	32	11	3UTR		0	0
hsa-miR-202-3p	NM_138468	ICA1L	AGAGGTATAGGGCATGGGAA#CCCATGTCTTAGGCCTCTC#((((((.(((((((((((..#))))))))))).)))))).	6601	6620	0.807692	-27	0	0.0186445	0.338	0	0	-5.48126	17	19	11	3UTR		0	0
hsa-miR-202-3p	NM_139055	ADAMTS15	AGAGGTATAGGGCATGGGAA#CCCAGCCGTATCCCTCC#.((((.(((.(((.((((..#))))))).))).)))).	4392	4409	0.807692	-22.1	0	0.0568101	0.412	0	0	-7.79363	14	17	7	3UTR		0	1
hsa-miR-202-3p	NM_139075	TPCN2	AGAGGTATAGGGCATGGGAA#CCGTGCCCTCCGCTTTC#.(((((..(((((((((...#)))))))))..))))).	2533	2550	0.807692	-21.7	0	0.00546745	0.441	0	0	-7.65065	14	17	9	3UTR		0	0
hsa-miR-202-3p	NM_144611	CYB5D2	AGAGGTATAGGGCATGGGAA#CCCTTGACACTTGTGTGCCCTGGGATGCCTCC#.(((((((((((((((((..#)))...........)))))))...))))))).	1410	1442	0.807692	-22.9	1	7.40112e-07	0.382	3.45167	2.44781	-3.79332	17	32	7	3UTR		0	0
hsa-miR-202-3p	NM_144618	GABPB2	AGAGGTATAGGGCATGGGAA#CCCATGTGCTGTCCTTCTG#(((((.((((.(((((((..#))))))).)))).))))).	8494	8513	0.807692	-23.5	0	0.0139394	0.441	0	0	-8.66331	16	19	7	3UTR		0	0
hsa-miR-202-3p	NM_145008	YPEL4	AGAGGTATAGGGCATGGGAA#TCCGCATGCCCCTCCCTCC#.((((....((((((((((.#))).)))))))...)))).	822	841	0.807692	-22.8	0	0.00999575	0.324	0.200534	-0.564832	-10.608	14	19	7	3UTR		0	0
hsa-miR-202-3p	NM_145200	CABP4	AGAGGTATAGGGCATGGGAA#TCTCAGCTGCCCACCGTTCCTCA#.((((.((.((((((((((.#)))))..)))))...)).)))).	1117	1140	0.807692	-19.1	0	0.00515017	0.426	0.492182	0.0206653	-6.75067	16	23	5	3UTR		0	0
hsa-miR-202-3p	NM_145244	DDIT4L	AGAGGTATAGGGCATGGGAA#TTCCCACTAACAGTTATCTTTGACTCTCTTGCCTGTTATGCTTA#..((((((((((((.((((.#.)))).)))))..))))))).	2460	2504	0.807692	-17.9	1	0.0171872	0.603	0	0	-5.69245	16	21	7	3UTR		0	0
hsa-miR-202-3p	NM_145269	CIBAR1	AGAGGTATAGGGCATGGGAA#TCCATGCTTTCATTACCA#...((((.((((((((((..#))))))))))...)))).	1321	1339	0.807692	-17.5	0	0.0862906	0.632	0	0	-8.82818	14	18	10	3UTR		0	0
hsa-miR-202-3p	NM_152238	SNX7	AGAGGTATAGGGCATGGGAA#TGCCGTGTCCTTATAAAGTGGATGAAAAATGTTTTGTACCCATCTG#(((((((((((((((((.(.#).)))))))))........................)))))..))).	1271	1317	0.807692	-18	1	0.0108934	0.662	0	0	-3.93757	18	46	9	3UTR		0	0
hsa-miR-202-3p	NM_152267	RNF185	AGAGGTATAGGGCATGGGAA#TCCCAGTGCCGCTCTGTTCTCTT#(((((.(((((((((((((.#))))).))))...))))))))).	1224	1247	0.807692	-19.9	0	0.140105	0.441	-0.15664	-0.281271	-5.83853	18	23	9	3UTR		0	0
hsa-miR-202-3p	NM_152293	TADA2B	AGAGGTATAGGGCATGGGAA#TGGTGCCCTGAGCCTCG#.(((((.((((((((.(...#).)))))))).))))).	2596	2613	0.807692	-23.3	0	1.10097e-05	0.368	-1.09421	-0.127637	-5.57006	14	17	8	3UTR		0	0
hsa-miR-202-3p	NM_152791	ZNF555	AGAGGTATAGGGCATGGGAA#CCCGTGCTCCAGAGGCCTTC#.(((((...(((((((((..#))))))))).....))))).	7392	7412	0.807692	-21.5	0	0.000103837	0.441	0	0	-8.70704	14	20	9	3UTR		0	0
hsa-miR-202-3p	NM_172193	KLHDC1	AGAGGTATAGGGCATGGGAA#TTACCATGCAAGTTATCTCTG#(((((((....((((((..(#)..))))))....))))))).	2402	2423	0.807692	-17.1	1	0.126747	0.765	0	0	-11.3749	14	21	7	3UTR		0	0
hsa-miR-202-3p	NM_173547	TRIM65	AGAGGTATAGGGCATGGGAA#CCATGCCTATGTGCCCA#.(.((((((((((((((...#)))))))).))))))).	1603	1620	0.807692	-21.6	0	0.00016367	0.382	0	0	-5.35086	15	17	8	3UTR		0	0
hsa-miR-202-3p	NM_173826	TCAIM	AGAGGTATAGGGCATGGGAA#CCGTGCCTAACAACTGTACTTA#..(((((((((((((((...#)))))))......)))))))).	3130	3152	0.807692	-19	1	0.0478668	0.691	-1.00313	0.157095	-4.957	15	22	8	3UTR		0	0
hsa-miR-202-3p	NM_174909	TMEM167A	AGAGGTATAGGGCATGGGAA#TTCTCATTCCTGTTGATTACCTACCTCA#.(((((((((((.(((((((#))))))))))))).........))))).	3747	3775	0.807692	-18	1	0.114991	0.662	0	0	-5.08246	18	28	13	3UTR		0	1
hsa-miR-202-3p	NM_175056	ZPLD1	AGAGGTATAGGGCATGGGAA#CCCATGTTCTTACA#....(((.((((((((((..#))))))))))))).	2541	2555	0.807692	-17.5	0	0.0615397	0.676	0	0	-11.8602	13	14	13	3UTR		0	1
hsa-miR-202-3p	NM_175726	IL5RA	AGAGGTATAGGGCATGGGAA#TCACACATGCCTCAGTGCCTCA#.(((((((.((((((((((.#)).).)))))))..))))))).	1865	1887	0.807692	-22.2	1	0.00418546	0.471	0	0	-4.84971	17	22	7	3UTR		0	0
hsa-miR-202-3p	NM_178013	PRIMA1	AGAGGTATAGGGCATGGGAA#CCCATGCCTTGGGCTGTCC#.(((((.(((((((((((..#))))))))))).))).)).	2525	2544	0.807692	-22.2	0	1.08666e-07	0.426	0	0	-5.33701	16	19	11	3UTR		0	0
hsa-miR-202-3p	NM_178155	FUT8	AGAGGTATAGGGCATGGGAA#TCATGCCCTGCTTTTGAGAGTACCA#...((((((((((((((...#)))))))))..........))))).	3340	3365	0.807692	-18.9	0	0.00121559	0.485	0.248791	0.00591806	-6.51454	14	25	9	3UTR		0	0
hsa-miR-202-3p	NM_178156	FUT8	AGAGGTATAGGGCATGGGAA#TCATGCCCTGCTTTTGAGAGTACCA#...((((((((((((((...#)))))))))..........))))).	4513	4538	0.807692	-18.9	0	0.00121559	0.485	0.150349	0.237928	-6.51454	14	25	9	3UTR		0	0
hsa-miR-202-3p	NM_178509	STXBP4	AGAGGTATAGGGCATGGGAA#CCCATGCCCAGAGCTGGCACTCTA#((((((...(((((((((..#))))))))).......)).)))).	8604	8628	0.807692	-22.9	0	3.44217e-05	0.456	0	0	-8.85129	15	24	9	3UTR		0	0
hsa-miR-202-3p	NM_178547	ZBTB8OS	AGAGGTATAGGGCATGGGAA#CTCATGCCCTTCCAGTGCAATGCAAGCCCTCCAGCCTCA#.(((((..((((((((((..#)))))))))).......................))))).	795	834	0.807692	-22.5	0	0.0318088	0.412	0	0	-7.65065	15	39	10	3UTR	MIRT516076	0	0
hsa-miR-202-3p	NM_178832	MORN4	AGAGGTATAGGGCATGGGAA#CCTTGTATGTGCCCTGTCACCTG#..((((((((((((((((..#))).....))))))))).)))).	741	764	0.807692	-21.2	1	0.000629229	0.456	-0.606268	-0.21069	-4.957	16	23	9	3UTR		0	0
hsa-miR-202-3p	NM_181342	FKBP7	AGAGGTATAGGGCATGGGAA#TCCCACCCGCCACCTTG#.(((((...(((..(((((.#))))))))...))))).	2050	2067	0.807692	-17.8	0	0.0983626	0.456	-0.242113	0.01148	-10.853	13	17	8	3UTR		0	0
hsa-miR-202-3p	NM_181356	SUPT3H	AGAGGTATAGGGCATGGGAA#TTCCTGCCATCTGCCTTTC#(((((((...((((.((((.#))))))))...))))))).	1906	1925	0.807692	-17.9	1	0.155039	0.529	0	0	-9.28556	15	19	8	3UTR		0	0
hsa-miR-202-3p	NM_182758	WDR72	AGAGGTATAGGGCATGGGAA#TTCCAGTGTTCTGTATTTTTA#(((((((((((((((.((((#)))).))))))))))))))).	6523	6544	0.807692	-19.2	1	0.0628846	0.779	0	0	-4.17062	19	21	15	3UTR		0	0
hsa-miR-202-3p	NM_183240	TMEM37	AGAGGTATAGGGCATGGGAA#CCCATCTTCTAGCAGCTGGCTGTGCCTCTG#((((((((((((((((((..#))))).........)))..)))))))))).	1283	1313	0.807692	-21.8	1	1.27714e-05	0.456	-0.242365	-0.119727	-3.93757	18	30	10	3UTR		0	0
hsa-miR-202-3p	NM_194441	BTN3A1	AGAGGTATAGGGCATGGGAA#TCCCCGGCCCTATGGCCG#...((((((((((..((((.#))))..)))))))).)).	2724	2742	0.807692	-23.2	0	4.34867e-07	0.456	0	0	-8.10683	14	18	8	3UTR		0	0
hsa-miR-202-3p	NM_198833	SERPINB8	AGAGGTATAGGGCATGGGAA#TGCCTGCCATTGCCTCTG#(((((((...((((.((.(.#).))))))..))))))).	1471	1489	0.807692	-19.1	1	0.00709944	0.471	0	0	-9.28556	14	18	7	3UTR		0	0
hsa-miR-202-3p	NM_199359	TPD52L2	AGAGGTATAGGGCATGGGAA#CCCTGCCCTAAAGGGCTCTTGAGCCTCTG#((((((.(((((((.(((..#))))))))))............)))))).	1541	1570	0.807692	-22.8	0	7.84374e-07	0.412	0	0	-6.21671	16	29	10	3UTR		0	0
hsa-miR-202-3p	NM_199360	TPD52L2	AGAGGTATAGGGCATGGGAA#CCCTGCCCTAAAGGGCTCTTGAGCCTCTG#((((((.(((((((.(((..#))))))))))............)))))).	1670	1699	0.807692	-22.8	0	7.84374e-07	0.412	0	0	-6.21671	16	29	10	3UTR		0	0
hsa-miR-202-3p	NM_199361	TPD52L2	AGAGGTATAGGGCATGGGAA#CCCTGCCCTAAAGGGCTCTTGAGCCTCTG#((((((.(((((((.(((..#))))))))))............)))))).	1610	1639	0.807692	-22.8	0	7.84374e-07	0.412	0	0	-6.21671	16	29	10	3UTR		0	0
hsa-miR-202-3p	NM_199362	TPD52L2	AGAGGTATAGGGCATGGGAA#CCCTGCCCTAAAGGGCTCTTGAGCCTCTG#((((((.(((((((.(((..#))))))))))............)))))).	1643	1672	0.807692	-22.8	0	7.84374e-07	0.412	0	0	-6.21671	16	29	10	3UTR		0	0
hsa-miR-202-3p	NM_199363	TPD52L2	AGAGGTATAGGGCATGGGAA#CCCTGCCCTAAAGGGCTCTTGAGCCTCTG#((((((.(((((((.(((..#))))))))))............)))))).	1583	1612	0.807692	-22.8	0	7.84374e-07	0.412	0	0	-6.21671	16	29	10	3UTR		0	0
hsa-miR-202-3p	NM_199367	SPG7	AGAGGTATAGGGCATGGGAA#TCCCGGCTCCTGTGCTG#...((((((((((.(((((.#))))))).)))))))).	1920	1937	0.807692	-21.2	0	4.23451e-07	0.294	0	0	-7.37138	15	17	8	3UTR		0	0
hsa-miR-202-3p	NM_201412	LUC7L	AGAGGTATAGGGCATGGGAA#TCTGATGCTGCCTCC#.(((((....(((((.(((.#))).)))))))))).	1416	1431	0.807692	-16.8	0	0.506266	0.619	0	0	-10.1826	13	15	10	3UTR		0	0
hsa-miR-202-3p	NM_207446	FAM174B	AGAGGTATAGGGCATGGGAA#CCCATGTAAGAGGCTTTGTGCCTTG#.(((((((((((((((((..#))))).......)))))))))))).	853	878	0.807692	-20.9	1	1.16669e-06	0.529	-0.222287	-0.269001	-3.79332	17	25	12	3UTR		0	0
hsa-miR-202-3p	XM_005245599	DEDD	AGAGGTATAGGGCATGGGAA#CCCATGTGCCTGGGCTTCC#.(((((.(((((((((((..#))))))).)))).))))).	1409	1428	0.807692	-22.2	0	0.000213507	0.441	0	0	-5.33701	16	19	7	3UTR		0	0
hsa-miR-202-3p	XM_005248833	BTN3A1	AGAGGTATAGGGCATGGGAA#TCCCCGGCCCTATGGCCG#...((((((((((..((((.#))))..)))))))).)).	2415	2433	0.807692	-23.2	0	4.34867e-07	0.456	0	0	-8.10683	14	18	8	3UTR		0	0
hsa-miR-202-3p	XM_005249916	RAPGEF5	AGAGGTATAGGGCATGGGAA#TTCCCATATTCCATGCTTTCTGCCTCTG#(((((((.(((((((((((.#.))))))))))).))))))).	6554	6582	0.807692	-25.9	1	0.0433832	0.691	0	0	-6.25121	18	21	11	3UTR		0	0
hsa-miR-202-3p	XM_005250561	VGF	AGAGGTATAGGGCATGGGAA#TCTCCAGCCCTTCGGGCCTCC#.(((((..(((((.(((((.#)).))))))))....))))).	2593	2614	0.807692	-22	0	6.59334e-06	0.368	0	0	-8.50749	15	21	8	3UTR		0	0
hsa-miR-202-3p	XM_005255315	SBK1	AGAGGTATAGGGCATGGGAA#TCCTTTTGCCTTAGGCCTCG#.(((((.(((((((.((((.#))))..))))))).))))).	4048	4068	0.807692	-23.6	0	0.00572716	0.456	0	0	-6.07246	16	20	7	3UTR		0	0
hsa-miR-202-3p	XM_005260978	MX1	AGAGGTATAGGGCATGGGAA#TCCTGTCGGAGCCCTGTCTCCTCTC#(((((.(((((((((((((.#))))))....)))))))..))))).	2849	2874	0.807692	-22.8	0	0.000839098	0.47	0	0	-5.83853	18	25	7	3UTR		0	0
hsa-miR-202-3p	XM_005260979	MX1	AGAGGTATAGGGCATGGGAA#TCCTGTCGGAGCCCTGTCTCCTCTC#(((((.(((((((((((((.#))))))....)))))))..))))).	3042	3067	0.807692	-22.8	0	0.000839098	0.47	0	0	-5.83853	18	25	7	3UTR		0	0
hsa-miR-202-3p	XM_005260980	MX1	AGAGGTATAGGGCATGGGAA#TCCTGTCGGAGCCCTGTCTCCTCTC#(((((.(((((((((((((.#))))))....)))))))..))))).	2814	2839	0.807692	-22.8	0	0.000839098	0.47	0	0	-5.83853	18	25	7	3UTR		0	0
hsa-miR-202-3p	XM_005260981	MX1	AGAGGTATAGGGCATGGGAA#TCCTGTCGGAGCCCTGTCTCCTCTC#(((((.(((((((((((((.#))))))....)))))))..))))).	2694	2719	0.807692	-22.8	0	0.000844102	0.477	0	0	-5.83853	18	25	7	3UTR		0	0
hsa-miR-202-3p	XM_005260982	MX1	AGAGGTATAGGGCATGGGAA#TCCTGTCGGAGCCCTGTCTCCTCTC#(((((.(((((((((((((.#))))))....)))))))..))))).	2679	2704	0.807692	-22.8	0	0.000839098	0.47	0	0	-5.83853	18	25	7	3UTR		0	0
hsa-miR-202-3p	XM_006721612	KIAA0753	AGAGGTATAGGGCATGGGAA#TCCTGTGCCTGGGTGAAGGTACAGACCTCG#.(((((...((((((((((.#))))))))))..............))))).	3450	3480	0.807692	-21.7	0	2.3618e-05	0.426	0	0	-8.70704	15	30	10	3UTR		0	0
hsa-miR-202-3p	XM_006722994	U2AF2	AGAGGTATAGGGCATGGGAA#CCCTCAGTGCCCTGCCCTCTC#(((((..(((((((((((..#)))...)))))))).))))).	3003	3024	0.807692	-23	0	0.0819518	0.441	0	0	-7.38222	16	21	8	3UTR		0	0
hsa-miR-202-3p	XM_011513595	TADA2B	AGAGGTATAGGGCATGGGAA#TGGTGCCCTGAGCCTCG#.(((((.((((((((.(...#).)))))))).))))).	3219	3236	0.807692	-23.3	0	1.10097e-05	0.368	0	0	-5.57006	14	17	8	3UTR		0	0
hsa-miR-202-3p	XM_011515121	C7orf57	AGAGGTATAGGGCATGGGAA#CCCTCTGCCCTGCTGGCCTG#..((((.(((((((.(((..#)))..)))))))...)))).	1250	1270	0.807692	-21.5	0	3.74888e-05	0.441	0	0	-7.23614	14	20	7	3UTR		0	0
hsa-miR-202-3p	XM_011523279	SIAH1	AGAGGTATAGGGCATGGGAA#TTCCCATGCCCTGCCCCTCTT#(((((..(((((((((((((#)))))))))))))..))))).	3695	3716	0.807692	-31	0	0.112527	0.5	0	0	-7.38222	18	21	13	3UTR		0	0
hsa-miR-202-3p	XM_011529109	CD40	AGAGGTATAGGGCATGGGAA#TTTGCATGACCCTGCCTCA#.(((((..((((((((.(((#))).)))).))))))))).	1262	1281	0.807692	-20.6	0	0.0458422	0.426	0	0	-7.65065	16	19	9	3UTR		0	0
hsa-miR-202-3p	XM_011529568	MX1	AGAGGTATAGGGCATGGGAA#TCCTGTCGGAGCCCTGTCTCCTCTC#(((((.(((((((((((((.#))))))....)))))))..))))).	3383	3408	0.807692	-22.8	0	0.000839098	0.47	0	0	-5.83853	18	25	7	3UTR		0	0
hsa-miR-202-3p	XM_011530473	MICALL1	AGAGGTATAGGGCATGGGAA#TGCCAGTGCCCTGCAGCCTCG#.(((((.((((((((((.(.#).))).)))))))..))))).	4025	4046	0.807692	-23.5	0	9.19696e-05	0.413	0	0	-5.33701	16	21	7	3UTR		0	0
hsa-miR-202-3p	XM_011530556	PPM1F	AGAGGTATAGGGCATGGGAA#CCCAGCCTTACCCCTCA#.((((..((((((.((((..#))))))))))..)))).	3217	3234	0.807692	-22.4	0	0.0765767	0.426	0	0	-8.09481	14	17	10	3UTR		0	0
hsa-miR-202-3p	XM_011536815	FCF1	AGAGGTATAGGGCATGGGAA#TTCCTCTGCCTTTCTTCG#.((((...((((((.(((((#))))).)))))).)))).	621	639	0.807692	-17.2	0	0.0874262	0.603	0	0	-10.2871	15	18	6	3UTR		0	0
hsa-miR-202-3p	XM_017011374	SUPT3H	AGAGGTATAGGGCATGGGAA#TTCCTGCCATCTGCCTTTC#(((((((...((((.((((.#))))))))...))))))).	1606	1625	0.807692	-17.9	1	0.155039	0.529	0	0	-9.28556	15	19	8	3UTR		0	0
hsa-miR-202-3p	XM_017018142	TMEM135	AGAGGTATAGGGCATGGGAA#TTCATCAAGCCTTGTATACTTCTG#(((((((((((((.((((((#))).))).))))..))))))))).	2462	2486	0.807692	-17.7	1	0.0434436	0.676	0	0	-4.79441	19	24	9	3UTR		0	0
hsa-miR-202-3p	XM_017020036	CAPS2	AGAGGTATAGGGCATGGGAA#TTTCCTGTCCTTTCACATTGTTTTTTGCTACCTCTT#(((((((.((((((.(((((#))))))))))).................))))))).	2503	2539	0.807692	-17.7	1	0.274253	0.618	0	0	-6.98666	18	36	11	3UTR		0	0
hsa-miR-202-3p	XM_017024344	TRIM65	AGAGGTATAGGGCATGGGAA#CCATGCCTATGTGCCCA#.(.((((((((((((((...#)))))))).))))))).	1416	1433	0.807692	-21.6	0	0.00016367	0.382	0	0	-5.35086	15	17	8	3UTR		0	0
hsa-miR-202-3p	XM_017028349	MX1	AGAGGTATAGGGCATGGGAA#TCCTGTCGGAGCCCTGTCTCCTCTC#(((((.(((((((((((((.#))))))....)))))))..))))).	3358	3383	0.807692	-22.8	0	0.000839098	0.47	0	0	-5.83853	18	25	7	3UTR		0	0
hsa-miR-202-3p	XM_017028350	MX1	AGAGGTATAGGGCATGGGAA#TCCTGTCGGAGCCCTGTCTCCTCTC#(((((.(((((((((((((.#))))))....)))))))..))))).	3061	3086	0.807692	-22.8	0	0.000839098	0.47	0	0	-5.83853	18	25	7	3UTR		0	0
hsa-miR-202-3p	XM_017028351	MX1	AGAGGTATAGGGCATGGGAA#TCCTGTCGGAGCCCTGTCTCCTCTC#(((((.(((((((((((((.#))))))....)))))))..))))).	2672	2697	0.807692	-22.8	0	0.000833865	0.478	0	0	-5.83853	18	25	7	3UTR		0	0
hsa-miR-202-3p	XM_017028352	MX1	AGAGGTATAGGGCATGGGAA#TCCTGTCGGAGCCCTGTCTCCTCTC#(((((.(((((((((((((.#))))))....)))))))..))))).	2690	2715	0.807692	-22.8	0	0.000833865	0.478	0	0	-5.83853	18	25	7	3UTR		0	0
hsa-miR-202-3p	XM_017029423	RPS6KA6	AGAGGTATAGGGCATGGGAA#TCTAGTGCTGTTATGCCTTC#.((((((((.(((((.(((.#))).)))))..)))))))).	5302	5322	0.807692	-18	1	0.015831	0.632	0	0	-5.26888	16	20	8	3UTR		0	0
hsa-miR-202-3p	XM_024446572	SUPT3H	AGAGGTATAGGGCATGGGAA#TTCCTGCCATCTGCCTTTC#(((((((...((((.((((.#))))))))...))))))).	1731	1750	0.807692	-17.9	1	0.155039	0.529	0	0	-9.28556	15	19	8	3UTR		0	0
hsa-miR-202-3p	NM_014228	SLC6A7	AGAGGTATAGGGCATGGGAA#TCCCTTGTCCTGGTGGCCTTC#.(((((.(((((((.((((.#)))).)))))))...))))).	3221	3242	0.807692	-22.6	0	0.000921611	0.397	0	0	-6.07246	16	21	7	3UTR		0	0
hsa-miR-202-3p	NM_014335	EID1	AGAGGTATAGGGCATGGGAA#TGTATCACGTGTGCTTTGTATCTTA#.(((((((((((((((.(..#.).))))))))))))))).	1161	1186	0.807692	-18.7	1	0.0701882	0.676	0.107595	0.66032	-3.79332	16	19	15	3UTR		0	0
hsa-miR-202-3p	NM_014415	ZBTB11	AGAGGTATAGGGCATGGGAA#TTCCTGTTTTCATGCCCAAATGTTGCCTTTT#(((((((..(((((((((((#.)))))))))))......))))))).	5355	5386	0.807692	-20.7	1	0.0152019	0.485	4.08588	5.01556	-7.3076	18	26	11	3UTR		0	0
hsa-miR-202-3p	NM_014496	RPS6KA6	AGAGGTATAGGGCATGGGAA#TCTAGTGCTGTTATGCCTTC#.((((((((.(((((.(((.#))).)))))..)))))))).	4396	4416	0.807692	-18	1	0.015831	0.632	0	0	-5.26888	16	20	8	3UTR		0	0
hsa-miR-202-3p	NM_014553	TFCP2L1	AGAGGTATAGGGCATGGGAA#CCCATGCCTCTAATCCTA#..(((..(((((((((((..#)))))))).)))..))).	6118	6136	0.807692	-22.8	0	0.00016792	0.456	0	0	-8.40165	14	18	8	3UTR		0	0
hsa-miR-202-3p	NM_014634	PPM1F	AGAGGTATAGGGCATGGGAA#CCCAGCCTTACCCCTCA#.((((..((((((.((((..#))))))))))..)))).	3456	3473	0.807692	-22.4	0	0.0765767	0.426	0	0	-8.09481	14	17	10	3UTR		0	0
hsa-miR-202-3p	NM_014804	KIAA0753	AGAGGTATAGGGCATGGGAA#TCCTGTGCCTGGGTGAAGGTACAGACCTCG#.(((((...((((((((((.#))))))))))..............))))).	3791	3821	0.807692	-21.7	0	2.3618e-05	0.426	0	0	-8.70704	15	30	10	3UTR		0	0
hsa-miR-202-3p	NM_014825	URB1	AGAGGTATAGGGCATGGGAA#TCCCTGAACCCCATGCCTCTG#((((((((.(((...((((.#))))....))).)))))))).	8579	8600	0.807692	-23.2	1	1.24758e-05	0.368	0	0	-7.87538	15	21	8	3UTR		0	0
hsa-miR-202-3p	NM_015016	MAST3	AGAGGTATAGGGCATGGGAA#TGCCATGCCCAGGCAGTGCCTG#..((((((.((((((((.(.#).)))))))).....)))))).	4876	4898	0.807692	-22.1	1	2.17702e-07	0.471	0	0	-6.01339	15	22	8	3UTR		0	0
hsa-miR-202-3p	NM_015076	CDK19	AGAGGTATAGGGCATGGGAA#TCCTGTGCCCTAAAGCCTCA#.(((((.((((((((((((.#))))))))))))..))))).	3718	3738	0.807692	-28.7	0	0.0194796	0.515	0	0	-5.33701	17	20	12	3UTR		0	0
hsa-miR-202-3p	NM_015476	TPGS2	AGAGGTATAGGGCATGGGAA#TTTCCACCTGCTCTGCCTGCCTCTT#((((((((((((((((((((#))))))..)))))))..))))))).	2079	2104	0.807692	-22.1	1	0.00772199	0.485	0.00941266	0.407009	-3.93757	20	25	7	3UTR		0	0
hsa-miR-202-3p	NM_015564	LRRTM2	AGAGGTATAGGGCATGGGAA#TCTCCATCCCATGTACCA#...(((((((((.((((((.#)).))))))).)))))).	2363	2381	0.807692	-18.8	0	0.397246	0.574	0.894973	0.236545	-7.80367	15	18	7	3UTR		0	0
hsa-miR-202-3p	NM_015842	LMO7	AGAGGTATAGGGCATGGGAA#TTCTTTTGCCTTGTTCTCTG#(((((.((((((((.(((((#))))).))))))))))))).	6685	6705	0.807692	-19.4	0	0.0154287	0.559	0.216532	0.0504606	-6.57398	18	20	13	3UTR		0	0
hsa-miR-202-3p	NM_015891	CDC40	AGAGGTATAGGGCATGGGAA#TCCTTGCCCTTACG#....(((.((((((.((((.#))))))))))))).	3375	3389	0.807692	-17.2	0	2.04116e-05	0.588	0.185592	0.266936	-12.5956	13	14	13	3UTR		0	0
hsa-miR-202-3p	NM_016027	LACTB2	AGAGGTATAGGGCATGGGAA#TTTCTATGCACCTTTACTCTTTC#(((((((.((((((((((((#))))))))).))).))).)))).	1320	1343	0.807692	-18.8	1	0.202024	0.647	5.58911	4.17599	-6.25121	19	23	9	3UTR		0	0
hsa-miR-202-3p	NM_016541	GNG13	AGAGGTATAGGGCATGGGAA#TCCCAGCCCCACTCA#.(((.....((((.(((((.#)))))))))..))).	695	710	0.807692	-18.7	0	0.0842836	0.324	4.55051	2.89371	-15.5839	12	15	9	3UTR		0	0
hsa-miR-202-3p	NM_017437	CPSF2	AGAGGTATAGGGCATGGGAA#TCCCAGTGGACAAATTTGGAAATATATGCGTCTATGCTTGTTACCTCA#.((((((..(((((((((..#.)))))))))..)))))).	12536	12584	0.807692	-22.5	1	0.0137727	0.721	0.0164041	-0.248337	-7.16335	15	19	9	3UTR		0	0
hsa-miR-202-3p	NM_017637	BNC2	AGAGGTATAGGGCATGGGAA#TCCAGCTGCCCTGTTCAGCCTG#..((((((((((((((((..#))))..))))))))...)))).	7158	7180	0.807692	-20.3	1	0.000383541	0.574	1.77508	1.14006	-4.957	16	22	8	3UTR		0	1
hsa-miR-202-3p	NM_017807	OSGEP	AGAGGTATAGGGCATGGGAA#TCCTGAGTAAGGATGCCATTGTGCCTG#..(((((((((((((((((.#))))........))))).)))))))).	1504	1531	0.807692	-19.1	1	0.000291059	0.574	5.6103	4.28075	-4.957	17	27	8	3UTR		0	0
hsa-miR-202-3p	NM_017842	SLC48A1	AGAGGTATAGGGCATGGGAA#TTCTCCTGCCTTGGCCTCTC#((((((.(((((((.(((((#))))).))))))))))))).	898	918	0.807692	-22.3	0	0.0010772	0.441	-0.272084	-0.302711	-6.21671	18	20	13	3UTR		0	0
hsa-miR-202-3p	NM_018337	ZNF444	AGAGGTATAGGGCATGGGAA#TCCCATCGTCCTCCTCC#.((((...(((((((((((.#)))))).))))))))).	1349	1366	0.807692	-21.2	0	0.78808	0.382	0	0	-9.55161	15	17	9	3UTR		0	0
hsa-miR-202-3p	NM_018712	ELMOD1	AGAGGTATAGGGCATGGGAA#CCCATGGTATTTTATACCTTC#.(((((((((((((((((..#))))))...))))))))))).	2794	2815	0.807692	-19.6	1	0.00055536	0.706	3.90035	2.90063	-3.79332	17	21	11	3UTR		0	0
hsa-miR-202-3p	NM_020150	SAR1A	AGAGGTATAGGGCATGGGAA#TCCTCTGTCCTAAAGCGTACTTCTT#((((((((((((((.((((.#)))).)))))).....)))))))).	5442	5467	0.807692	-20.3	1	0.0213983	0.603	4.61208	5.29782	-4.67302	18	25	8	3UTR	MIRT682231	0	0
hsa-miR-202-3p	NM_020188	CMC2	AGAGGTATAGGGCATGGGAA#TTCCATGCTTTACATCTCA#.(((((.((((((((((((.#)))))))))))).))))).	3386	3405	0.807692	-22.5	0	0.13811	0.471	0	0	-5.33701	17	19	12	3UTR		0	0
hsa-miR-202-3p	NM_020672	S100A14	AGAGGTATAGGGCATGGGAA#CCTAGCCTGCACCTGTCCTCA#.((((.((((((((((((..#))))...))).))))))))).	510	531	0.807692	-19.9	0	0.0405283	0.441	-0.167969	-0.250186	-5.69428	16	21	9	3UTR		0	0
hsa-miR-202-3p	NM_020773	TBC1D14	AGAGGTATAGGGCATGGGAA#CCTGTGCGCTGTTGTCCTCG#.((((.((((.(((((((..#))))))).))))...)))).	4089	4109	0.807692	-21.9	0	0.00464378	0.456	-0.0588726	0.257212	-8.51906	15	20	7	3UTR		0	0
hsa-miR-202-3p	NM_020868	DPP10	AGAGGTATAGGGCATGGGAA#CCCATAGCTGCATACCCTTCTA#((((((((..((((((((..#))))).)))..)))))..))).	5715	5737	0.807692	-18.4	1	0.127248	0.529	0	0	-6.23647	16	22	5	3UTR		0	0
hsa-miR-202-3p	NM_021188	ZNF410	AGAGGTATAGGGCATGGGAA#CCCAGGCTGAGGTACTATCTTGTCCTATACACTTC#.(((((((((((((((((..#))))................)))))))))).))).	2203	2238	0.807692	-19.8	1	0.145785	0.574	1.10615	1.86537	-3.79332	17	35	10	3UTR		0	0
hsa-miR-202-3p	NM_021195	CLDN6	AGAGGTATAGGGCATGGGAA#CCCACCTCCAACACTGCACCCTTCTGCCCTGCCCCCCTCG#.((((..(((((((.(((..#.)))...)))))))....)))).	1271	1311	0.807692	-21.1	0	0.0682534	0.441	2.69166	2.03292	-7.97342	14	23	7	3UTR		0	0
hsa-miR-202-3p	NM_021940	SMAP1	AGAGGTATAGGGCATGGGAA#CCTGAATGCTCTGTAGCCTA#..((((((((((((((((..#)))..)))))))))).))).	2706	2726	0.807692	-19	1	0.117077	0.618	0	0	-4.957	16	20	10	3UTR		0	1
hsa-miR-202-3p	NM_021972	SPHK1	AGAGGTATAGGGCATGGGAA#CCCTGGGCCGCGCTGTGCCTTA#.((((((((((((..(((..#)))...)))...))))))))).	1590	1612	0.807692	-20.5	1	1.09415e-05	0.412	-0.293065	-0.459186	-5.38561	15	22	9	3UTR		0	0
hsa-miR-202-3p	NM_021980	OPTN	AGAGGTATAGGGCATGGGAA#TTCATGCTTTCATTGTACCTG#..((((((((((((((((..#))))))))....)))))))).	2928	2949	0.807692	-17	1	0.0197948	0.574	0.402577	0.349531	-4.957	16	21	8	3UTR		0	0
hsa-miR-202-3p	NM_022744	RUSF1	AGAGGTATAGGGCATGGGAA#CCTACATGGCTGCCCTGTGCCCTCG#.(((((((((((((((((..#))))......))))))))))).)).	2306	2331	0.807692	-23.5	1	0.000249695	0.397	4.80298	4.06563	-3.79332	17	25	11	3UTR		0	0
hsa-miR-202-3p	NM_022780	RMND5A	AGAGGTATAGGGCATGGGAA#TCCGTGCTGTGCGGCTTCA#.(((((.((.((((((((..#)))))))).))..))))).	3164	3183	0.807692	-19.6	0	0.000395887	0.382	-0.126019	-0.239765	-6.57952	15	19	8	3UTR		0	0
hsa-miR-202-3p	NM_023013	PRAMEF1	AGAGGTATAGGGCATGGGAA#CCCGTGTCCTAGAGTCG#.((....(((((((((((..#)))))))))))...)).	1906	1923	0.807692	-20.9	0	0.000203827	0.529	-0.208043	-0.33723	-14.389	13	17	11	3UTR		0	0
hsa-miR-202-3p	NM_024015	HOXB4	AGAGGTATAGGGCATGGGAA#CCCATCTGTCTTGTTTCCTCTG#(((((.((((((((((((..#))))..))))))))..))))).	1171	1193	0.807692	-21	0	0.0011381	0.368	-0.00469767	0.188486	-5.83853	17	22	8	3UTR		0	0
hsa-miR-202-3p	NM_024584	CCDC121	AGAGGTATAGGGCATGGGAA#TCCTTCAATGTGCCTTTACCTTG#.((((((.(((((((((((.#)))).....))))))))))))).	2238	2261	0.807692	-19.2	1	0.0418411	0.691	0.158798	-0.339328	-6.10696	17	23	13	3UTR		0	0
hsa-miR-202-3p	NM_024936	ZCCHC4	AGAGGTATAGGGCATGGGAA#TTGCCTGCCTTGGCCTCC#.(((((.(((((((.((.((#)).)))))))))))))).	2088	2106	0.807692	-19.8	0	0.000220431	0.441	0.200851	-0.0646609	-6.07246	16	18	14	3UTR		0	0
hsa-miR-202-3p	NM_001968	EIF4E	AGAGGTATAGGGCATGGGAA#TTCGCCTTTGTCTTGTACTTCTG#((((((((((((((.(((((#))).))..)))))))))))))).	821	844	0.807692	-21.4	1	0.063133	0.691	0.0816223	0.0528788	-4.67302	19	23	14	3UTR		0	0
hsa-miR-202-3p	NM_002064	GLRX	AGAGGTATAGGGCATGGGAA#TCGGCATGTCTCTACCTCTA#(((((((..(((((((.((.#))..))))))).))))))).	686	706	0.807692	-18.8	1	0.00371386	0.588	0	0	-7.3076	16	20	7	3UTR		0	0
hsa-miR-202-3p	NM_002102	GYPE	AGAGGTATAGGGCATGGGAA#TCCCTGTTCTCCTGCCTA#..(((((.((((((.((((.#))))))))))..))))).	427	445	0.807692	-18	0	0.0250361	0.603	0	0	-8.00609	15	18	10	3UTR		0	0
hsa-miR-202-3p	NM_002237	KCNG1	AGAGGTATAGGGCATGGGAA#CCTGCCCTGCCTGCCATCTG#((((((((((((((.((...#)))))))))..)))).))).	1820	1840	0.807692	-20	1	0.00173193	0.338	0	0	-4.67302	16	20	9	3UTR		0	0
hsa-miR-202-3p	NM_002435	MPI	AGAGGTATAGGGCATGGGAA#CCCAGGCCATTCTGCCCTGACCACCTCC#.(((((.(((((((((((..#))))........)))))))...))))).	4014	4042	0.807692	-22.5	0	0.00452282	0.471	0	0	-5.33701	16	28	7	3UTR		0	0
hsa-miR-202-3p	NM_002462	MX1	AGAGGTATAGGGCATGGGAA#TCCTGTCGGAGCCCTGTCTCCTCTC#(((((.(((((((((((((.#))))))....)))))))..))))).	2725	2750	0.807692	-22.8	0	0.000844102	0.477	0	0	-5.83853	18	25	7	3UTR		0	0
hsa-miR-202-3p	NM_002481	PPP1R12B	AGAGGTATAGGGCATGGGAA#CCCATGCCTTTGGACCTG#..((((..((((((((((..#))))))))))...)))).	12392	12410	0.807692	-23.4	0	0.000579844	0.441	0	0	-8.81432	14	18	10	3UTR		0	0
hsa-miR-202-3p	NM_002534	OAS1	AGAGGTATAGGGCATGGGAA#TCCTAAGCCCTTTAATATGCACTCTC#(((((((((((((.(((((.#))))).))))).....)))).)))).	1396	1422	0.807692	-21.2	1	0.542644	0.578	0	0	-4.79441	18	26	5	3UTR		0	0
hsa-miR-202-3p	NM_002640	SERPINB8	AGAGGTATAGGGCATGGGAA#TGCCTGCCATTGCCTCTG#(((((((...((((.((.(.#).))))))..))))))).	1454	1472	0.807692	-19.1	1	0.00709944	0.471	0	0	-9.28556	14	18	7	3UTR		0	0
hsa-miR-202-3p	NM_002943	RORA	AGAGGTATAGGGCATGGGAA#TTCCCATGTCTGTAAGATGAAAAGGATACCTTTA#((((((((.(((((((((((#)))))))))))..............)))))))).	7107	7141	0.807692	-21.5	1	0.00785707	0.706	0	0	-4.99396	19	34	11	3UTR		0	0
hsa-miR-202-3p	NM_003268	TLR5	AGAGGTATAGGGCATGGGAA#CCATGTTCTGTCTCACTAACCTCC#.((((((((((((((((...#))))))))))).......))))).	3336	3360	0.807692	-20.2	1	0.119855	0.676	2.74625	1.68665	-3.79332	16	24	11	3UTR		0	0
hsa-miR-202-3p	NM_003418	CNBP	AGAGGTATAGGGCATGGGAA#CCCATGCCCTGTTTCCCCCCACTTCG#.(((((((((((((((((..#))))))))))))........))))).	2943	2969	0.807692	-26.4	1	0.192705	0.559	4.03529	4.91847	-3.79332	17	26	12	3UTR		0	0
hsa-miR-202-3p	NM_003927	MBD2	AGAGGTATAGGGCATGGGAA#CTCATGCTGCCACTATTCCTCA#.((((.((((((((((((..#))))))))....)))).)))).	4290	4312	0.807692	-19.9	0	0.0477079	0.5	4.68984	4.68364	-5.69428	16	22	8	3UTR	MIRT501933	0	1
hsa-miR-202-3p	NM_004051	BDH1	AGAGGTATAGGGCATGGGAA#TCCCGACTTCAAGTGATCCGCCTGCCTTGGCCTCC#.(((((.(((((((.((((.#.))).).)))))))))))).	2137	2172	0.807692	-20.7	0	1.95328e-05	0.456	4.30869	3.52572	-6.07246	16	20	12	3UTR		0	0
hsa-miR-202-3p	NM_004097	EMX1	AGAGGTATAGGGCATGGGAA#CCCTGGTCTCTACCTCC#.((((((.(((.((.(((..#))))).))).)))))).	1765	1782	0.807692	-19.4	1	3.82047e-05	0.441	0	0	-10.1892	14	17	6	3UTR		0	0
hsa-miR-202-3p	NM_004290	RNF14	AGAGGTATAGGGCATGGGAA#CCTTTGCCCTACCTTCTG#(((((..(((((((.(((..#))).))))))).))))).	2475	2493	0.807692	-20.7	0	0.288844	0.647	-0.314063	0.219871	-8.11767	15	18	7	3UTR		0	0
hsa-miR-202-3p	NM_004334	BST1	AGAGGTATAGGGCATGGGAA#TCCAGCCCTGCAGCCTCC#.(((((.((((((.((((..#))))))))))..))))).	1064	1082	0.807692	-22.1	0	0.00182862	0.456	0.0221435	-0.365896	-6.19385	15	18	10	3UTR		0	0
hsa-miR-202-3p	NM_004352	CBLN1	AGAGGTATAGGGCATGGGAA#TCGTGCTCTGTGACTCC#.(((..(((((((((((...#)))))))))))..))).	1707	1724	0.807692	-19.5	0	0.000392157	0.441	5.32491	4.98533	-9.81332	14	17	11	3UTR		0	0
hsa-miR-202-3p	NM_004480	FUT8	AGAGGTATAGGGCATGGGAA#TCATGCCCTGCTTTTGAGAGTACCA#...((((((((((((((...#)))))))))..........))))).	4181	4206	0.807692	-18.9	0	0.00121559	0.485	0.150349	0.237928	-6.51454	14	25	9	3UTR		0	0
hsa-miR-202-3p	NM_004481	GALNT2	AGAGGTATAGGGCATGGGAA#CCCTGCCACTCTGTGGTCGGTGCCCTGCTTCCTCC#.((((..((((((((.((..#.)).))))))))...)))).	3235	3270	0.807692	-21.5	0	0.0216519	0.309	-1.69627	-0.655594	-7.47102	14	20	8	3UTR		0	1
hsa-miR-202-3p	NM_004515	ILF2	AGAGGTATAGGGCATGGGAA#TCCCATTTGTGACCTATGCCATCC#.((((((((((((((((((.#)))))..)))..)))))))).)).	1418	1442	0.807692	-21.1	1	0.0525041	0.559	4.41382	4.91127	-3.79332	18	24	8	3UTR		0	0
hsa-miR-202-3p	NM_004571	PKNOX1	AGAGGTATAGGGCATGGGAA#CCCAAATTGAGCATGTTGCTGTTATTCCTGCCCTGCACCTGTG#(.((((.(((((((.((((.#.))))))))))).)))).).	4447	4490	0.807692	-22.4	0	0.000773217	0.426	0	0	-7.38039	16	20	11	3UTR		0	0
hsa-miR-202-3p	NM_004593	TRA2B	AGAGGTATAGGGCATGGGAA#CAAATGCCCGTTTTCCTCC#.((((....((((((..(..#)..)))))).....)))).	1472	1491	0.807692	-17.6	0	0.268637	0.647	-0.740412	-0.308579	-10.841	11	19	6	3UTR		0	0
hsa-miR-202-3p	NM_004725	BUB3	AGAGGTATAGGGCATGGGAA#CCCCTGCCCTAGAGCATCTG#(((.((.(((((((.(((..#))).)))))))..)).))).	6192	6212	0.807692	-21.3	0	0.00289669	0.485	0.436363	-0.028472	-9.24873	15	20	7	3UTR		0	0
hsa-miR-202-3p	NM_004784	NDST3	AGAGGTATAGGGCATGGGAA#CCATGCCCTGACTACTTA#..(((((((((((((((...#))))))))))..))))).	4596	4614	0.807692	-21.9	1	0.151717	0.647	-0.154527	0.0544756	-4.957	15	18	10	3UTR		0	1
hsa-miR-202-3p	NM_004873	BAG5	AGAGGTATAGGGCATGGGAA#CTCGTGATCCGCCCGCCTCG#.(((((...(((((((((..#)))))).)))....))))).	3634	3654	0.807692	-18.3	0	0.000188702	0.353	5.03189	3.75589	-8.70704	14	20	6	3UTR		0	0
hsa-miR-202-3p	NM_004896	VPS26A	AGAGGTATAGGGCATGGGAA#CATGCACCTGTATTTCC#.(((((((((((((((....#))))).)))))))))).	3304	3321	0.807692	-20.4	1	9.52312e-07	0.529	-0.118256	0.0460675	-3.79332	15	17	10	3UTR		0	0
hsa-miR-202-3p	NM_005036	PPARA	AGAGGTATAGGGCATGGGAA#CCCGTGAGTCTCCCCATACCTTG#.(((((((.(((((((((..#)))))).....))).))))))).	9477	9500	0.807692	-21.2	1	0.0185543	0.529	0	0	-4.84971	16	23	7	3UTR		0	1
hsa-miR-202-3p	NM_005348	HSP90AA1	AGAGGTATAGGGCATGGGAA#TTTTCATTCCCTGTAGTTGACAATTCTGCATGTACTAGTCCTCTA#(((((..(((.(((((((((#.)))).))))).)))..))))).	2663	2708	0.807692	-19	0	0.00296502	0.618	5.25926	4.52372	-10.207	17	23	5	3UTR		0	0
hsa-miR-202-3p	NM_005358	LMO7	AGAGGTATAGGGCATGGGAA#TTCTTTTGCCTTGTTCTCTG#(((((.((((((((.(((((#))))).))))))))))))).	7147	7167	0.807692	-19.4	0	0.0154287	0.559	0.216532	0.0504606	-6.57398	18	20	13	3UTR		0	0
hsa-miR-202-3p	NM_005420	SULT1E1	AGAGGTATAGGGCATGGGAA#TCCCATCTCAGCCTCC#.(((((...(((.((((((.#))))))))).))))).	1234	1250	0.807692	-18.9	0	0.0502375	0.5	2.70443	2.4379	-9.99617	14	16	9	3UTR		0	0
hsa-miR-202-3p	NM_006341	MAD2L2	AGAGGTATAGGGCATGGGAA#CCCTGATTCCAAGTGCTCTTATCGCCTCTG#(((((((((((((((.((((#.))))..)))).))))).)))))).	836	866	0.807692	-21.7	1	0.0301809	0.338	4.29828	4.75445	-4.17062	19	25	6	3UTR		0	0
hsa-miR-202-3p	NM_006516	SLC2A1	AGAGGTATAGGGCATGGGAA#CCCAATGAGCTGTCAAGCTGCCCTGTGTTCATTTCATTTGGAATTGCCCCCTCTG#((((((((((((((((((..#))))..............)))))))))......................))))).	3066	3121	0.807692	-20.8	1	0.00222187	0.529	4.75442	2.50871	-3.93757	18	55	9	3UTR		0	0
hsa-miR-202-3p	NM_006895	HNMT	AGAGGTATAGGGCATGGGAA#CCTATCCCTGTTTTCTTCC#.((((.((((((.(((((..#)))))))))))...)))).	2817	2836	0.807692	-17.3	0	0.0660869	0.647	0.578561	-0.0413092	-6.98341	15	19	11	3UTR		0	0
hsa-miR-202-3p	NM_006896	HOXA7	AGAGGTATAGGGCATGGGAA#TCCTGTGTTGTCCTGTACCCTG#((.((((((((((((((((.#))))))))...)))))))))).	1900	1922	0.807692	-22.4	0	0.04655	0.412	5.14778	5.91835	-5.49511	18	22	10	3UTR		0	0
hsa-miR-202-3p	NM_006901	MYO9A	AGAGGTATAGGGCATGGGAA#TTTCTATGCCCTAGACTACTTTTA#((((((((((((((((((((#)))))))))))))...))))))).	11823	11847	0.807692	-22.9	1	0.0768526	0.588	3.7741	4.20698	-3.93757	20	24	13	3UTR		0	0
hsa-miR-202-3p	NM_007048	BTN3A1	AGAGGTATAGGGCATGGGAA#TCCCCGGCCCTATGGCCG#...((((((((((..((((.#))))..)))))))).)).	2430	2448	0.807692	-23.2	0	4.34867e-07	0.456	-0.783221	-0.345571	-8.10683	14	18	8	3UTR		0	0
hsa-miR-202-3p	NM_012081	ELL2	AGAGGTATAGGGCATGGGAA#TCCCTGGTGCTCTTTTTTTACCTCA#.((((((.(((((((((((.#))))..))))))).....)))))).	3806	3831	0.807692	-21.5	1	0.0108466	0.676	4.10873	3.71261	-6.10696	17	25	7	3UTR		0	0
hsa-miR-202-3p	NM_012108	STAP1	AGAGGTATAGGGCATGGGAA#TTCCCATGCACTGACATAAGTTGAAAACACATAGTACTTTC#.(((((((((.(((((((((#))))))))).)).....................))))))).	1206	1247	0.807692	-18	1	0.0577627	0.647	-0.0246424	-0.128856	-6.6181	18	41	9	3UTR		0	0
hsa-miR-202-3p	NM_012109	TMEM59L	AGAGGTATAGGGCATGGGAA#TCTCCATGCCCCTATAAAGCGTGCCTG#..((((((.((((((((((.#)).)))))))).........)))))).	1549	1576	0.807692	-21.5	1	0.0232196	0.412	0.127239	-0.181952	-6.01339	16	27	8	3UTR		0	0
hsa-miR-202-3p	NM_012397	SERPINB13	AGAGGTATAGGGCATGGGAA#TTTCCATGACCCTAAGAAGTTTCCTCA#.((((..(((((((((((((#)))))))).)))))........)))).	2329	2356	0.807692	-21	0	0.0322209	0.647	-0.272599	-0.404127	-7.23797	17	27	8	3UTR		0	0
hsa-miR-202-3p	NM_013254	TBK1	AGAGGTATAGGGCATGGGAA#TCCCAGTTATCCTTGTATCCA#.(.(((((((((..(((((.#))))).....)))))))))).	2804	2825	0.807692	-17.3	0	0.0479318	0.647	0.136414	0.907516	-7.49683	15	21	10	3UTR		0	0
hsa-miR-202-3p	NM_014078	MRPL13	AGAGGTATAGGGCATGGGAA#TTCCCATATCTGTCCTGTTGGCTTCC#.(((((((((((((((((((#))))))....))))))))..))))).	1219	1245	0.807692	-21.5	1	0.0573975	0.556	-0.820659	1.39504	-3.79332	19	26	8	3UTR		0	0
hsa-miR-202-3p	NM_001322331	C2orf76	AGAGGTATAGGGCATGGGAA#TCCCAGGCTATACTCTTTG#((((((((((....(((((.#)))))..)))))).)))).	533	552	0.807692	-17.1	1	0.020884	0.706	0	0	-12.2551	15	19	6	3UTR		0	0
hsa-miR-202-3p	NM_001322810	DOCK5	AGAGGTATAGGGCATGGGAA#TCCCGTGTACTTTAAATCATGTCTAGATTATTTATAATACCTA#..((((((((.((((((((.#)))))))).)).........................)))))).	485	528	0.807692	-17.2	1	0.111882	0.765	0	0	-7.78178	16	43	8	3UTR		0	0
hsa-miR-202-3p	NM_001323909	GABPB2	AGAGGTATAGGGCATGGGAA#CCCATGTGCTGTCCTTCTG#(((((.((((.(((((((..#))))))).)))).))))).	8380	8399	0.807692	-23.5	0	0.0139394	0.441	0	0	-8.66331	16	19	7	3UTR		0	0
hsa-miR-202-3p	NM_001324097	GLYR1	AGAGGTATAGGGCATGGGAA#CCATGCCCCAGATGCCA#...(((((.((((((((...#))))))))...))))).	2191	2208	0.807692	-22.2	0	0.00948274	0.279	0	0	-7.57093	13	17	8	3UTR		0	0
hsa-miR-202-3p	NM_001324098	GLYR1	AGAGGTATAGGGCATGGGAA#CCATGCCCCAGATGCCA#...(((((.((((((((...#))))))))...))))).	2383	2400	0.807692	-22.2	0	0.00948274	0.279	0	0	-7.57093	13	17	8	3UTR		0	0
hsa-miR-202-3p	NM_001329788	ZPLD1	AGAGGTATAGGGCATGGGAA#CCCATGTTCTTACA#....(((.((((((((((..#))))))))))))).	2655	2669	0.807692	-17.5	0	0.0615397	0.676	0	0	-11.8602	13	14	13	3UTR		0	1
hsa-miR-202-3p	NM_001329990	MIGA2	AGAGGTATAGGGCATGGGAA#TCCTGATGCCCTCCCCACCTCA#.(((((..(((((((((((.#)))).)))))))....))))).	2412	2434	0.807692	-23.4	0	0.247557	0.412	0	0	-7.65065	16	22	7	3UTR		0	0
hsa-miR-202-3p	NM_001330183	SLFN5	AGAGGTATAGGGCATGGGAA#TCCCTGGTGATGCTCTATGAACCTA#..(((((((((((((((((.#)))).....)))))))))..)))).	1611	1636	0.807692	-19.8	1	0.0620361	0.441	4.15515	4.97111	-4.957	17	25	9	3UTR		0	0
hsa-miR-202-3p	NM_001330372	MPI	AGAGGTATAGGGCATGGGAA#CCCAGGCCATTCTGCCCTGACCACCTCC#.(((((.(((((((((((..#))))........)))))))...))))).	4103	4131	0.807692	-22.5	0	0.00452282	0.471	0	0	-5.33701	16	28	7	3UTR		0	0
hsa-miR-202-3p	NM_001330420	LUC7L	AGAGGTATAGGGCATGGGAA#TCTGATGCTGCCTCC#.(((((....(((((.(((.#))).)))))))))).	2519	2534	0.807692	-16.8	0	0.506266	0.619	0	0	-10.1826	13	15	10	3UTR		0	0
hsa-miR-202-3p	NM_001330475	ZBTB8OS	AGAGGTATAGGGCATGGGAA#CTCATGCCCTTCCAGTGCAATGCAAGCCCTCCAGCCTCA#.(((((..((((((((((..#)))))))))).......................))))).	1243	1282	0.807692	-22.5	0	0.0318088	0.412	0	0	-7.65065	15	39	10	3UTR	MIRT516076	0	0
hsa-miR-202-3p	NM_001330583	LMO7	AGAGGTATAGGGCATGGGAA#TTCTTTTGCCTTGTTCTCTG#(((((.((((((((.(((((#))))).))))))))))))).	6768	6788	0.807692	-19.4	0	0.0154287	0.559	0.216532	0.0504606	-6.57398	18	20	13	3UTR		0	0
hsa-miR-202-3p	NM_001330638	TBC1D14	AGAGGTATAGGGCATGGGAA#CCTGTGCGCTGTTGTCCTCG#.((((.((((.(((((((..#))))))).))))...)))).	3397	3417	0.807692	-21.9	0	0.00464378	0.456	0	0	-8.51906	15	20	7	3UTR		0	0
hsa-miR-202-3p	NM_001330638	TBC1D14	AGAGGTATAGGGCATGGGAA#TCCCATGCCAGTGTGGAACACCTTC#.((((((((.(((((((((.#)))))))))..))).....))))).	3667	3692	0.807692	-21.8	1	0.000186751	0.515	0	0	-5.03583	17	25	9	3UTR		0	0
hsa-miR-202-3p	NM_001331029	PPP1R12B	AGAGGTATAGGGCATGGGAA#CCCATGCCTTTGGACCTG#..((((..((((((((((..#))))))))))...)))).	12575	12593	0.807692	-23.4	0	0.000579844	0.441	0	0	-8.81432	14	18	10	3UTR		0	0
hsa-miR-202-3p	NM_001348781	CDRT15	AGAGGTATAGGGCATGGGAA#TCTCCATGCCACCACCTG#..((((....(((((((((.#)).)))))))...)))).	559	577	0.807692	-19.1	0	0.0903559	0.5	0	0	-11.1132	13	18	7	3UTR		0	0
hsa-miR-202-3p	NM_001349148	B3GALNT1	AGAGGTATAGGGCATGGGAA#TCTATGCCCTTGTTAATCTCC#.(((((..((((((((((..#)))))))))).....))))).	3161	3182	0.807692	-19.8	0	0.029371	0.647	0.217804	0.40494	-7.65065	15	21	10	3UTR		0	0
hsa-miR-202-3p	NM_001351968	CMC2	AGAGGTATAGGGCATGGGAA#TTCCATGCTTTACATCTCA#.(((((.((((((((((((.#)))))))))))).))))).	3456	3475	0.807692	-22.5	0	0.13811	0.471	0	0	-5.33701	17	19	12	3UTR		0	0
hsa-miR-202-3p	NM_001354611	EHMT1	AGAGGTATAGGGCATGGGAA#TCCCGTCTCTGCTGCCTCTG#((((((((((((.((((((.#))))))))))).))))))).	2126	2146	0.807692	-24.5	1	3.00664e-09	0.368	0	0	-5.22671	18	20	11	3UTR		0	0
hsa-miR-202-3p	NM_001354612	EHMT1	AGAGGTATAGGGCATGGGAA#TCCCGTCTCTGCTGCCTCTG#((((((((((((.((((((.#))))))))))).))))))).	2062	2082	0.807692	-24.5	1	3.00664e-09	0.368	0	0	-5.22671	18	20	11	3UTR		0	0
hsa-miR-202-3p	NM_001363944	DIPK2A	AGAGGTATAGGGCATGGGAA#CCCTGTGCCTTTA#((((((((((((........#)))))))))))).	3191	3204	0.807692	-18.4	1	0.229856	0.75	0	0	-7.05204	12	13	12	3UTR		0	0
hsa-miR-202-3p	NM_001366270	ZBTB8OS	AGAGGTATAGGGCATGGGAA#CTCATGCCCTTCCAGTGCAATGCAAGCCCTCCAGCCTCA#.(((((..((((((((((..#)))))))))).......................))))).	919	958	0.807692	-22.5	0	0.0318088	0.412	0	0	-7.65065	15	39	10	3UTR	MIRT516076	0	0
hsa-miR-202-3p	NM_001366886	GLT1D1	AGAGGTATAGGGCATGGGAA#TCTCGTGCCGTGTAATTCAATGTTTCATTCCGCTGCCTCC#.((((((((.(((((((((.#))))))))).))).....................))))).	2491	2531	0.807692	-22.2	1	0.111849	0.559	0	0	-5.03583	17	40	9	3UTR		0	0
hsa-miR-202-3p	NM_001366889	GLT1D1	AGAGGTATAGGGCATGGGAA#TCTCGTGCCGTGTAATTCAATGTTTCATTCCGCTGCCTCC#.((((((((.(((((((((.#))))))))).))).....................))))).	2539	2579	0.807692	-22.2	1	0.111849	0.559	0	0	-5.03583	17	40	9	3UTR		0	0
hsa-miR-202-3p	NM_001367600	RAPGEF5	AGAGGTATAGGGCATGGGAA#TTCCCATATTCCATGCTTTCTGCCTCTG#(((((((.(((((((((((.#.))))))))))).))))))).	5712	5740	0.807692	-25.9	1	0.0433832	0.691	0	0	-6.25121	18	21	11	3UTR		0	0
hsa-miR-202-3p	NM_001369387	GNAL	AGAGGTATAGGGCATGGGAA#CCCTGCCCTCGCTTCTC#((((((..((((((.(((..#))))))))).)))))).	5814	5831	0.807692	-21.7	0	0.0263468	0.456	0	0	-8.53035	15	17	9	3UTR		0	0
hsa-miR-202-3p	NM_001371285	ZBTB7C	AGAGGTATAGGGCATGGGAA#CCCGTGCCTTCCTGACCTTC#.(((((..((((((((((..#))))))))))....))))).	3673	3693	0.807692	-23.2	0	0.132199	0.426	0	0	-7.65065	15	20	10	3UTR		0	0
hsa-miR-202-3p	NM_001371321	C2orf50	AGAGGTATAGGGCATGGGAA#CCCAGCCGTGGCCTCC#.(((((.((.(((.((((..#))))))).))))))).	2656	2672	0.807692	-21.1	0	6.55405e-06	0.412	0	0	-7.43636	14	16	7	3UTR		0	0
hsa-miR-202-3p	NM_001371372	MAP3K7CL	AGAGGTATAGGGCATGGGAA#TTTCATGCCTTTAATATTTCA#.((((((((((((((((((.#)))))))))))..))))))).	955	976	0.807692	-19.2	1	0.170308	0.75	0	0	-3.79332	18	21	11	3UTR		0	0
hsa-miR-202-3p	NM_001371373	MAP3K7CL	AGAGGTATAGGGCATGGGAA#TTTCATGCCTTTAATATTTCA#.((((((((((((((((((.#)))))))))))..))))))).	1036	1057	0.807692	-19.2	1	0.170308	0.75	0	0	-3.79332	18	21	11	3UTR		0	0
hsa-miR-202-3p	NM_001374498	HSD17B4	AGAGGTATAGGGCATGGGAA#CCCAAGTCCTGTTTCCTTA#.((((.(((((((.((((..#)))).)))))))..)))).	2473	2492	0.807692	-21.3	0	0.0350208	0.706	0	0	-6.55112	15	19	7	3UTR		0	0
hsa-miR-202-3p	NM_001374500	HSD17B4	AGAGGTATAGGGCATGGGAA#CCCAAGTCCTGTTTCCTTA#.((((.(((((((.((((..#)))).)))))))..)))).	2830	2849	0.807692	-21.3	0	0.0350208	0.706	0	0	-6.55112	15	19	7	3UTR		0	0
hsa-miR-202-3p	NM_001374501	HSD17B4	AGAGGTATAGGGCATGGGAA#CCCAAGTCCTGTTTCCTTA#.((((.(((((((.((((..#)))).)))))))..)))).	2733	2752	0.807692	-21.3	0	0.0350208	0.706	0	0	-6.55112	15	19	7	3UTR		0	0
hsa-miR-202-3p	NM_001711	BGN	AGAGGTATAGGGCATGGGAA#GTGTGTGTGTGTGTCTTGTGCTTCC#.(((((((((((((((.(..#.).))))))))))))))).	1899	1924	0.807692	-18.8	1	0.0488886	0.485	0	0	-3.79332	16	19	15	3UTR		0	0
hsa-miR-202-3p	NM_000151	G6PC1	AGAGGTATAGGGCATGGGAA#TTCCCATGTGTGACTCCAGCCTGCCCTCA#.((((..(((((((((((((#)))))))))..........)))).)))).	1316	1345	0.807692	-20.4	0	0.023783	0.441	-0.174799	-0.196027	-7.23797	17	29	9	3UTR		0	0
hsa-miR-202-3p	NM_000353	TAT	AGAGGTATAGGGCATGGGAA#TCCCTTGCTCTGCGCTGCTA#((.(((.(((((((.((((.#)))).))))))).))).)).	1657	1677	0.807692	-20.6	0	6.15602e-05	0.544	0	0	-7.77425	16	20	7	3UTR		0	0
hsa-miR-202-3p	NM_000414	HSD17B4	AGAGGTATAGGGCATGGGAA#CCCAAGTCCTGTTTCCTTA#.((((.(((((((.((((..#)))).)))))))..)))).	2545	2564	0.807692	-21.3	0	0.0350208	0.706	0	0	-6.55112	15	19	7	3UTR		0	0
hsa-miR-202-3p	NM_000564	IL5RA	AGAGGTATAGGGCATGGGAA#TCACACATGCCTCAGTGCCTCA#.(((((((.((((((((((.#)).).)))))))..))))))).	1934	1956	0.807692	-22.2	1	0.00418546	0.471	0	0	-4.84971	17	22	7	3UTR		0	0
hsa-miR-202-3p	NM_000610	CD44	AGAGGTATAGGGCATGGGAA#TTCCCAGCCTCTGCTCCTCC#.((((..((((((.((((((#))))))))).)))..)))).	4066	4086	0.807692	-22.4	0	0.116048	0.426	0	0	-8.09481	16	20	9	3UTR		0	0
hsa-miR-202-3p	NM_000978	RPL23	AGAGGTATAGGGCATGGGAA#CCCACCCAGGCCTCTA#((((((...(((..((((..#)))))))..)))))).	672	688	0.807692	-18.8	0	0.00864376	0.5	0	0	-10.9973	13	16	7	3UTR		0	0
hsa-miR-202-3p	NM_000999	RPL38	AGAGGTATAGGGCATGGGAA#TCCGTGCCCGGTGCATCC#.((.((((.(((((((((..#))))))))).)))).)).	721	739	0.807692	-21.8	0	0.000214768	0.441	0	0	-7.88174	15	18	9	3UTR		0	0
hsa-miR-202-3p	NM_001001389	CD44	AGAGGTATAGGGCATGGGAA#TTCCCAGCCTCTGCTCCTCC#.((((..((((((.((((((#))))))))).)))..)))).	3937	3957	0.807692	-22.4	0	0.116048	0.426	0	0	-8.09481	16	20	9	3UTR		0	0
hsa-miR-202-3p	NM_001001390	CD44	AGAGGTATAGGGCATGGGAA#TTCCCAGCCTCTGCTCCTCC#.((((..((((((.((((((#))))))))).)))..)))).	3319	3339	0.807692	-22.4	0	0.116048	0.426	0	0	-8.09481	16	20	9	3UTR		0	0
hsa-miR-202-3p	NM_001001391	CD44	AGAGGTATAGGGCATGGGAA#TTCCCAGCCTCTGCTCCTCC#.((((..((((((.((((((#))))))))).)))..)))).	2923	2943	0.807692	-22.4	0	0.116048	0.426	0	0	-8.09481	16	20	9	3UTR		0	0
hsa-miR-202-3p	NM_001001392	CD44	AGAGGTATAGGGCATGGGAA#TTCCCAGCCTCTGCTCCTCC#.((((..((((((.((((((#))))))))).)))..)))).	2303	2323	0.807692	-22.4	0	0.116048	0.426	0	0	-8.09481	16	20	9	3UTR		0	0
hsa-miR-202-3p	NM_001001928	PPARA	AGAGGTATAGGGCATGGGAA#CCCGTGAGTCTCCCCATACCTTG#.(((((((.(((((((((..#)))))).....))).))))))).	9393	9416	0.807692	-21.2	1	0.0185543	0.529	0	0	-4.84971	16	23	7	3UTR		0	1
hsa-miR-202-3p	NM_001003841	SLC6A19	AGAGGTATAGGGCATGGGAA#TTCCCAGAGCCCTGTAGCCCTCG#.((((((((((((.((((((#))))))..))))))))..)))).	3087	3110	0.807692	-27.2	1	0.00204794	0.338	0	0	-4.65016	18	23	8	3UTR		0	0
hsa-miR-202-3p	NM_001004320	AGMO	AGAGGTATAGGGCATGGGAA#TTCCTAAGGCCACAGTTACCTTTG#(((((((...(((.((((((#))))))..))).....))))))).	1928	1952	0.807692	-18.1	1	0.00654671	0.603	0	0	-9.40695	16	24	7	3UTR		0	0
hsa-miR-202-3p	NM_001004360	DPP10	AGAGGTATAGGGCATGGGAA#CCCATAGCTGCATACCCTTCTA#((((((((..((((((((..#))))).)))..)))))..))).	5635	5657	0.807692	-18.4	1	0.127248	0.529	0	0	-6.23647	16	22	5	3UTR		0	0
hsa-miR-202-3p	NM_001004734	OR14I1	AGAGGTATAGGGCATGGGAA#TTCTTGTGTTCTCTGCCTTTA#(((((((.((((((((((((#)))))))))))).))))))).	3644	3665	0.807692	-20.2	1	0.165608	0.721	0	0	-6.25121	19	21	12	3UTR		0	0
hsa-miR-202-3p	NM_001005214	LRRC52	AGAGGTATAGGGCATGGGAA#CCCATCCCACCACCTTG#.(((((...(((.(((((..#))))))))...))))).	1299	1316	0.807692	-18.2	0	0.0231948	0.471	0	0	-9.99617	13	17	8	3UTR		0	0
hsa-miR-202-3p	NM_001007530	CDRT15	AGAGGTATAGGGCATGGGAA#TCTCCATGCCACCACCTG#..((((....(((((((((.#)).)))))))...)))).	683	701	0.807692	-19.1	0	0.0903559	0.5	0	0	-11.1132	13	18	7	3UTR		0	0
hsa-miR-202-3p	NM_001008528	MXRA7	AGAGGTATAGGGCATGGGAA#TCACTGTGCCCTTCACCTTC#.(((((..(((((((((((.#)).)))))))))..))))).	1513	1533	0.807692	-22.7	0	0.00011391	0.412	0	0	-7.65065	16	20	9	3UTR		0	0
hsa-miR-202-3p	NM_001009608	SLX4IP	AGAGGTATAGGGCATGGGAA#TCCCATGATCCCAGCCTCA#.(((((...((((((((((.#)))))))..))).))))).	2966	2985	0.807692	-23.1	0	0.20918	0.441	0	0	-8.70704	15	19	7	3UTR		0	0
hsa-miR-202-3p	NM_001012978	BEX5	AGAGGTATAGGGCATGGGAA#TCCCTGCTTTCTAAATTCGCATTTTTCCTGGTGTACCTTTA#((((((((((((((.((((.#)))))))))......................))))))))).	583	624	0.807692	-18.2	1	0.0193985	0.618	0	0	-4.67302	18	41	9	3UTR		0	0
hsa-miR-202-3p	NM_001013642	TRNP1	AGAGGTATAGGGCATGGGAA#TCCCAGCGCCCTCCTCA#.((((...(((((.(((((.#)))))..))))))))).	1028	1045	0.807692	-23.1	0	0.0115284	0.485	0	0	-10.4084	14	17	9	3UTR		0	0
hsa-miR-202-3p	NM_001015880	PAPSS2	AGAGGTATAGGGCATGGGAA#TCTGGTGCCCTGTCTACACCA#...((((((((((((.(((.#))).)))))))))....))).	3023	3044	0.807692	-21.8	0	1.95497e-05	0.412	0	0	-6.74759	15	21	9	3UTR		0	0
hsa-miR-202-3p	NM_001018039	SFMBT2	AGAGGTATAGGGCATGGGAA#TCCATACTGCCCATATCTCG#.(((((((.(((((((((..#))))...)))))))))))).	6975	6995	0.807692	-20.5	1	0.000558737	0.647	5.32766	3.51763	-4.84971	16	20	12	3UTR		0	0
hsa-miR-202-3p	NM_001024401	SBK1	AGAGGTATAGGGCATGGGAA#TCCCAGCCGCGACTTCTCCTTTTGCCTTAGGCCTCG#.(((((.(((((((.((((.#.))))..))))))).))))).	3933	3969	0.807692	-23.8	0	0.00572716	0.456	0	0	-6.07246	16	21	7	3UTR		0	0
hsa-miR-202-3p	NM_001025081	MBP	AGAGGTATAGGGCATGGGAA#TCCCACTTGCCCCTGTTACCTA#..(((((((((((((((((.#)))))..))))).))).)))).	703	725	0.807692	-22	1	0.0873989	0.529	0.40261	0.27873	-4.957	17	22	5	3UTR		0	0
hsa-miR-202-3p	NM_001038628	B3GALNT1	AGAGGTATAGGGCATGGGAA#TCTATGCCCTTGTTAATCTCC#.(((((..((((((((((..#)))))))))).....))))).	3252	3273	0.807692	-19.8	0	0.029371	0.647	0.194918	0.307119	-7.65065	15	21	10	3UTR		0	0
hsa-miR-202-3p	NM_001040084	ANXA8	AGAGGTATAGGGCATGGGAA#TGACCATGCCCTCAGCACCACTCTT#((((((..(((((((((..(#)..)))))))))..))....)))).	1899	1924	0.807692	-20	0	0.0139047	0.412	-0.453219	-0.26177	-7.7949	16	25	9	3UTR		0	0
hsa-miR-202-3p	NM_001042371	PGP	AGAGGTATAGGGCATGGGAA#CTAGGGGTGTGTGTCCTGTATTTTA#.(((((((((((((((.(..#.).))))))))))))))).	1353	1378	0.807692	-17.5	1	0.0711141	0.485	0	0	-3.79332	16	19	15	3UTR		0	0
hsa-miR-202-3p	NM_001085487	MYSM1	AGAGGTATAGGGCATGGGAA#TCCCAGTCTTCTGTCCATACCA#...(((((.((((((((((.#)))))......)))))))))).	6217	6239	0.807692	-19	0	0.0443015	0.485	3.79005	4.56163	-7.57093	15	22	10	3UTR		0	0
